# Supplementary material for: The Underestimated Prevalence of Neglected Chronic Pelvic Pain in Women, a Nationwide Cross-Sectional Study in France
Source: MDPI journal article supplement (doi:10.3390/jcm10112481), 2021-06-03
Supplement: s1 [file s1]

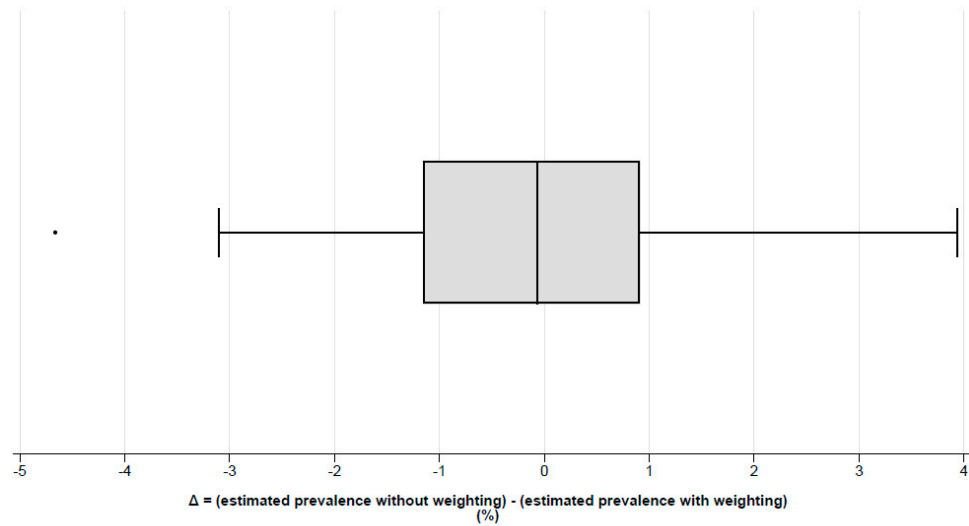

**Figure S1:** Summary of the difference between the estimate of prevalence without and with weighting within each of the three components of CPP (none, mild moderate and severe dysmenorrhea / none, sometimes often or always dyspareunia / NMCP) for each age group. N = 6191.

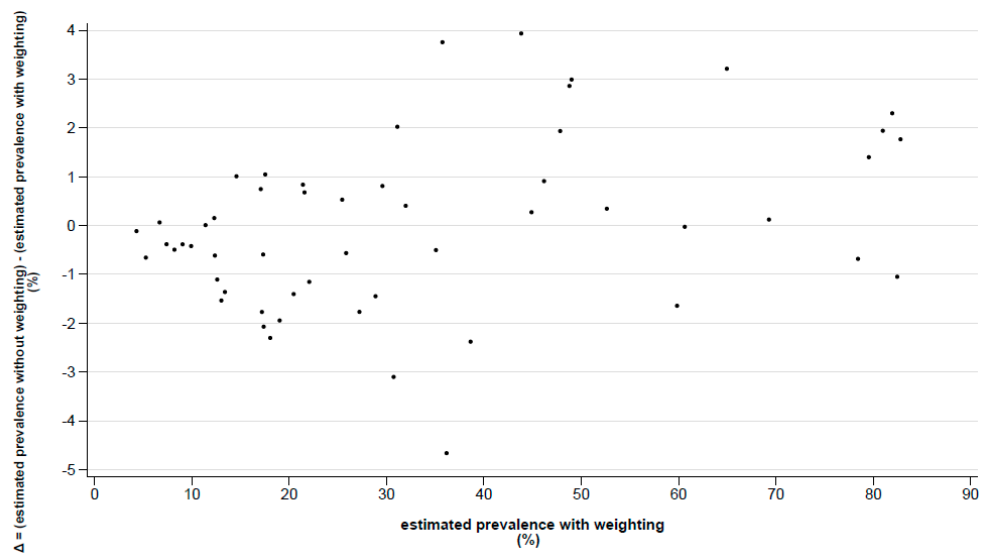

**Figure S2:** Distribution of the effects of the weighting within estimations of components of CPP according to level of each prevalence estimates (none, mild moderate and severe dysmenorrhea / none, sometimes often or always dyspareunia / NMCP) for each age group. N = 6191.
